## **IM30 IDPs form a membrane protective carpet upon super-complex disassembly**

Benedikt Junglas<sup>1</sup>, Roberto Orru<sup>2</sup>, Amelie Axt<sup>3,4</sup>, Carmen Siebenaller<sup>1</sup>, Wieland Steinchen<sup>5</sup>, Jennifer Heidrich<sup>1</sup>, Ute A. Hellmich<sup>1,6</sup>, Nadja Hellmann<sup>1</sup>, Eva Wolf<sup>2,7</sup>, Stefan A. L. Weber<sup>3,4</sup> and Dirk Schneider<sup>1,\*</sup>

<sup>1</sup>Institute of Pharmacy and Biochemistry, Johannes Gutenberg University Mainz, 55128 Mainz, Germany.

<sup>2</sup>Institute of Molecular Physiology, Johannes Gutenberg University Mainz, 55128 Mainz, Germany.

<sup>3</sup>Max Planck-Institute for Polymer Research, 55128 Mainz, Germany.

<sup>4</sup>Institute of Physics, Johannes Gutenberg University Mainz, 55099 Mainz, Germany.

<sup>5</sup>Philipps-University Marburg, Center for Synthetic Microbiology (SYNMIKRO) and Department of Chemistry, 35032 Marburg, Germany.

<sup>6</sup>Centre for Biomolecular Magnetic Resonance (BMRZ), Goethe-University Frankfurt, 60438 Frankfurt, Germany.

<sup>7</sup>Institute of Molecular Biology (IMB), 55128 Mainz, Germany.

### **\*Address correspondence to**

Dirk Schneider, Johannes Gutenberg University Mainz, Institute of Pharmacy and Biochemistry, Johann-Joachim-Becher-Weg 30, 55128 Mainz, Germany

Phone: (+49) 6131 39-25833, Fax: (+49) 6131 39-25348, E-mail: Dirk.Schneider@uni-mainz.de

**Keywords:** IM30, Vipp1, oligomeric state, structural model, ab initio modeling, flexible fitting, small-angle X-ray scattering (SAXS), multi-angle light scattering (MALS), CD-Spectroscopy, hydrogen deuterium exchange (HDX), Atomic force microscopy (AFM), protein carpets, membrane protection, IDP, intrinsically disordered protein

1 **Abstract**

2 Members of the *phage shock protein A* (PspA) family, including the *inner membrane-associated protein of*  
3 *30 kDa* (IM30), are suggested to stabilize stressed cellular membranes. Furthermore, IM30 is essential in  
4 thylakoid membrane-containing chloroplasts and cyanobacteria, where it is involved in membrane  
5 biogenesis and/or remodeling. While it is well known that PspA and IM30 bind to membranes, the  
6 mechanism of membrane stabilization is still enigmatic. Here we report that ring-shaped IM30 super-  
7 complexes disassemble on membranes, resulting in formation of a membrane-protecting protein carpet.  
8 Upon ring dissociation, the C-terminal domain of IM30 unfolds, and the protomers self-assemble on  
9 membranes. IM30 assemblies at membranes have been observed before *in vivo* and were associated to stress  
10 response in cyanobacteria and chloroplasts. These assemblies likely correspond to the here identified carpet  
11 structures. Our study defines the thus far enigmatic structural basis for the physiological function of IM30  
12 and related proteins, including PspA, and highlights a hitherto unrecognized concept of membrane  
13 stabilization by intrinsically disordered proteins.

## 14 **Introduction**

15 The *inner membrane-associated protein of 30 kDa* (IM30), also known as *vesicle inducing protein*  
16 *in plastids* (VIPP1), is a protein conserved in chloroplasts and cyanobacteria, where it is involved  
17 in thylakoid membrane (TM) biogenesis and/or maintenance<sup>1-15</sup>. A striking feature of IM30 protein  
18 family members is the ability to form large homo-oligomeric super-complexes with masses  
19 exceeding 1 MDa<sup>16-18</sup>. With transmission electron microscopy (TEM), a ring-like organization  
20 with a distinct spike architecture has been observed for these complexes<sup>19</sup>. Besides ring structures,  
21 rod-like particles have also been observed that might form via ring stacking<sup>17,19-24</sup>. Although no  
22 high-resolution structure of IM30 is currently available, the IM30 structure appears to resemble the  
23 structure of its supposed ancestor, the bacterial *phage shock protein A* (PspA)<sup>1,16,20</sup>. For both protein  
24 monomers, six  $\alpha$ -helical segments have been predicted. In addition, IM30 contains an extra helix  
25 at its C-terminus. A coiled-coil hairpin structure of two extended helices (helices 2 and 3) likely  
26 represents the structural core of both, PspA and IM30<sup>25</sup>. The structure of this fragment has recently  
27 been solved and was used as a template for the prediction of the IM30 full-length tertiary  
28 structure<sup>19</sup>. IM30 binds to membranes, where it forms assemblies, as it has been observed in *in vivo*  
29 studies with GFP-labeled IM30. In cyanobacteria and chloroplasts, such assemblies form  
30 dynamically at TM margins<sup>3,9,11</sup>. It has been proposed that these assemblies are involved in  
31 membrane protection/stabilization<sup>4,26</sup>, due to the membrane protective effects of IM30 observed in  
32 *Arabidopsis thaliana* chloroplasts<sup>9,10,13,14</sup>. Importantly, the IM30 rings can adsorb to negatively  
33 charged membranes<sup>12</sup>, albeit the formation of large ring structures is clearly not crucial for  
34 membrane binding *in vitro*, as small IM30 oligomers bind to negatively charged membranes with  
35 even higher affinity than IM30 rings<sup>27</sup>. Therefore, the interaction of IM30 with membranes may  
36 thermodynamically drive ring disassembly on membrane surfaces and thus entail disassembly of

37 IM30 rings on the membrane surface. However, the question whether and how IM30 rings may  
38 disassemble during membrane interaction is completely unsolved so far.

39 Here we show that IM30 rings disassemble on membrane surfaces upon binding, and disassembly  
40 of IM30 rings involves unfolding of the predicted helices 3-7 located in the C-terminal half of the  
41 protein. Intrinsically disordered IM30 can bind with high affinity to membrane surfaces where  
42 protomers assemble to form a surface-covering carpet structure that stabilizes membranes.

43

## 44 **Results**

45 *IM30 super-complexes disassemble upon membrane binding and rearrange into carpet-like*  
46 *structures*

47 Supporting the hypothesis that IM30 rings undergo a structural rearrangement upon membrane  
48 binding, we observed differences in the trypsin-digestion pattern of IM30 in absence *vs.* presence  
49 of phosphatidylglycerol (PG)-containing liposomes (Supplementary Fig. 1). Yet, these  
50 observations do not allow to clearly discriminate between rearrangements of the IM30 structure,  
51 shielding of IM30 regions due to membrane binding, or a combination of both. To probe potential  
52 ring disassembly upon membrane binding more directly, we next employed the FRET signal  
53 established between CFP and Venus-labeled IM30 monomers incorporated in IM30 rings. While  
54 we observed decreasing FRET in the presence of PG liposomes (Fig. 1a), indicating a change in  
55 the relative distance between individual monomers upon membrane binding, these FRET changes  
56 remained minor and leveled off at high lipid concentrations. Thus, some structural changes  
57 potentially occur, possibly limited disassembly; yet, on average the monomers appear to stay in  
58 close contact on the membrane surface.

59 To visualize IM30 bound to PG supported lipid bilayers (SLBs), we next used Atomic Force  
60 Microscopy (AFM). While the expected ring structures were apparent when IM30 WT was bound  
61 to a mica surface (Supplementary Fig. 3a/b), flat carpet-like structures became visible on the  
62 membrane surfaces after incubating a PG bilayer with IM30 WT (Fig. 1a). These structures cover  
63 an area of several hundred nm<sup>2</sup>, have a rough and uneven surface, and a height of 0.7-1.9 nm  
64 (average height: ~0.9 nm). As IM30 rings have a height of 13-15 nm<sup>19</sup>, these carpets do clearly  
65 not form simply via lateral association of multiple IM30 rings on a membrane surface, again  
66 suggesting disassembly of membrane-bound IM30 rings into smaller oligomers and their  
67 rearrangement on the membrane surface. To investigate whether the formation of the observed  
68 carpet structures requires the preceding formation of IM30 rings, we made use of an  
69 oligomerization-impaired mutant (IM30\*). At suitable NaCl concentrations, IM30\* exclusively  
70 forms dimers (Supplementary Fig. 2). Since the IM30\* carpets are alike those formed by the WT  
71 protein, we conclude that carpet formation by IM30 does not *per se* require ring formation (and  
72 subsequent dissociation) (Fig. 1.b). Noteworthy, carpet formation was not observed when IM30  
73 WT or IM30\* were incubated on mica surfaces, *i.e.*, in absence of a membrane (Supplementary  
74 Fig. 4). As cyanobacterial and chloroplast membranes typically contain about 40% negatively  
75 charged membrane lipids<sup>15</sup>, we additionally analyzed the formation of carpet structures on PC: PG  
76 (60:40) membrane surfaces (Supplementary Fig. 5). Yet, IM30 WT, as well as IM30\*, disassemble  
77 and form carpet structures, also on this membrane surface, excluding the possibility that the  
78 observed carpet-formation was induced by the highly charged membrane surface.

79

80

81

82 *IM30 carpets protect destabilized liposomal membranes*

83 Due to the importance of IM30 for TM maintenance, we wondered whether formation of the carpet  
84 structures might have functional consequences, *e.g.*, for the membrane integrity. We therefore  
85 compared the ability of IM30 WT super-oligomeric rings *vs.* IM30\* dimers to maintain a proton  
86 gradient across a membrane, using a fluorescence-based proton leakage assay. Here, proton flux  
87 into the liposomes was measured as a decrease in ACMA fluorescence<sup>28,29</sup>. Only a small proton  
88 flux was measured with untreated PG liposomes (control, Fig. 1d), whereas addition of 6% (v/v)  
89 isopropanol weakened the membrane integrity considerably and increased the proton permeability  
90 of the liposomal membranes (negative control, Fig. 1d). Addition of IM30 WT and IM30\* led to a  
91 reduced proton permeability of the liposomes, with IM30\* showing enhanced reduction, possibly  
92 because the energetic cost of disassembly did not have to be paid. When we compared membrane  
93 binding of IM30\* with IM30 WT rings over 20 min, the binding kinetics between the two proteins  
94 differed (Fig. 1e). Binding of the dimeric IM30\* reached equilibrium earlier than the WT protein.  
95 This indicates that membrane binding of IM30 WT rings is slower than binding of smaller IM30\*  
96 oligomers. The faster binding of IM30\* could just be due to a larger number of particles adsorbing  
97 to the membranes compared to the rings, at identical monomer concentration. Only upon ring  
98 disassembly, full membrane adsorption of IM30 WT monomers is accomplished. Taken together,  
99 the interaction of IM30 with negatively charged membranes involves an initial membrane-binding  
100 step (potentially involving minor structural changes and ring destabilization), subsequent ring  
101 disassembly and rearrangement to carpet structures that form a protective layer on the membrane.

102

103

104 *IM30 is highly flexible when not organized in super-complexes*

105 As the dimeric IM30\* protein appears to be hyper-functional in the proton leakage assay (Fig. 1d),  
106 we next elucidated the structure and shape of small IM30 oligomers using SAXS (small-angle X-  
107 ray scattering) coupled to size exclusion chromatography (SEC-SAXS). The SEC elution profile  
108 and the averaged scattering intensity confirmed a high sample homogeneity (Fig. 2a/b and  
109 Supplementary Fig. 10a). Analysis of the SAXS data resulted in a molecular mass of  $63.2 \pm 5.2$  kDa,  
110 expected for an IM30\* dimer (Supplementary Fig. 10a). We obtained a radius of gyration of  
111  $6.13 \pm 0.05$  nm and the pair distance distribution yielded a  $D_{max}$  of 26 nm (Fig. 2c and Supplementary  
112 Fig. 10b), indicating that IM30\* adopts an elongated shape. When we compared our SAXS data  
113 with the structures of other proteins in a dimensionless Kratky-plot, it became apparent that IM30\*  
114 does not have a well-defined, compact and spherical shape, but an extended and somewhat flexible  
115 structure with a high content of unstructured regions (Fig. 2d). Indeed, CD analyses showed that  
116 ~40% of IM30\* is unstructured. In contrast, the IM30 WT protein has an  $\alpha$ -helix content of ~80%  
117 (Fig. 2e/f), in line with the IM30 structural model proposed by Saur *et al.*<sup>19</sup>.

118

119 *IM30 dimers have a disordered N-terminus and C-terminal domain*

120 To assess the inherent structural flexibility of IM30\* dimers in greater detail, we carried out limited  
121 proteolysis and observed a single stable IM30 fragment of ~17 kDa, which contained parts of helix  
122 1 to approximately half of helix 4 (Fig. 3a). In conclusion, helix 1 and helix 4-7 appear to be flexible  
123 in the IM30 monomer, whereas helices 2 and 3 form a stable structure. To more clearly define the  
124 disordered regions, we next used hydrogen-deuterium exchange (HDX) measurements coupled to  
125 LC-MS on the IM30\* and IM30 WT proteins. The results were mapped on the structural model of

126 the monomer suggested by Saur *et al.*<sup>19</sup> (Fig. 3b). The HDX data confirmed that helices 2 and 3a  
127 in the suspected stable core region indeed exhibited only weak H/D exchange in both IM30 WT  
128 and IM30\*. As expected, the flexible linker between helix 6 and 7 showed high H/D exchange in  
129 both variants, as did helix 7 (Supplementary Fig. 8a/b). The major structural difference between  
130 IM30\* and IM30 WT lies in the region of the predicted helices 1, 3b, 4, and 5/6, where the WT  
131 protein showed less H/D exchange than the mutant (Fig. 3b and Supplementary Fig. 8). Likely,  
132 IM30\* has an unstructured N-terminal domain (helix 1) and a mostly unstructured C-terminal  
133 domain (helices 3b-7), in excellent agreement with the limited proteolysis data (Fig. 3a). Indeed,  
134 using CD and 1D-<sup>1</sup>H-NMR spectroscopy of the isolated IM30\_H3b-7 fragment, we could confirm  
135 that this region is completely unstructured (Supplementary Fig. 9). Hence, IM30\* dimers have an  
136 unstructured C-terminal domain, while IM30 is highly structured when organized in higher-ordered  
137 (ring) structures (Fig. 2e/f and Supplementary Fig. 8b). Thus, as IM30 WT forms nearly exclusively  
138 large super-complexes in solution<sup>17,19</sup>, the formation of such higher-ordered structures appears to  
139 induce folding of otherwise intrinsically disordered IM30 regions.

140 To generate a structural model of IM30 monomers that includes the highly flexible nature of the  
141 IM30\* C-terminus, we used a fragmentation-based modeling approach based on SAXS envelopes,  
142 starting from the structural model described in Saur *et al.*<sup>19</sup>. The SAXS envelopes were calculated  
143 as described in detail in Supplementary Fig. 10. We used the available X-ray structure of the PspA  
144 helix 2/3 fragment<sup>25</sup> as a rigid structural core and rendered the remaining parts of the structure as  
145 highly flexible and/or unstructured (as identified above). The resulting models and their respective  
146 SAXS envelopes are shown in Supplementary Fig. 12. All envelopes used are compatible with the  
147 experimental scattering pattern, fitting to a similar degree, and thus all calculated conformations  
148 likely represent actual IM30\* dimer structures. Each envelope can be considered as a snapshot of  
149 one possible conformer, indicating enormous flexibility in the dimer interface region. In Fig. 4d,



150 the intrinsic flexibility is visualized by superimposing individual monomers from each SAXS-  
151 model, aligned at the structured core (helices 2+3) of the respective monomers.

152 To define the IM30 regions that mediate dimer formation, we next used SEC coupled multi-angle  
153 laser light scattering (SEC-MALS) and determined the oligomeric state of two truncated IM30  
154 versions, representing the stable structural core (helices 2+3; IM30\_H2-3a) and the intrinsically  
155 disordered C-terminus (helices 3b-7; IM30\_H3b-7) (Supplementary Fig. 13). While IM30\_H3b-7  
156 likely formed dimers, IM30\_H2-3a exclusively formed monomers under our experimental  
157 conditions. Thus, IM30\* dimerizes via residues located in the C-terminal domains, in line with our  
158 dimer models (Supplementary Fig. 12), whereas the N-terminal region could mediate membrane  
159 interaction. In fact, stable membrane interaction of the isolated helix 2/3 fragment has been  
160 demonstrated recently<sup>30</sup>. Based on our dimer models (Supplementary Fig. 12), the flexible linker  
161 between the regions assigned as helix 6 and 7 in the model predicted by Saur *et al.*<sup>19</sup>, appears to be  
162 crucially involved in mediating contacts between two adjacent monomers. To validate the predicted  
163 role of this region in IM30\* dimerization, we created an IM30\* variant where Ala227, located in  
164 the extended linker between helix 6 and 7 (compare Supplementary Fig. 2a), was mutated to Cys.  
165 This mutant ran as a dimer on SDS gels after purification (Fig. 3c), which indicates that the regions  
166 between helix 6 and 7 of two adjacent monomers are indeed in close contact in IM30\* dimers.  
167 Noteworthy, also the IM30 WT protein formed covalently linked dimers, when we introduced the  
168 A227C mutation into the IM30 WT sequence (Fig. 3c). Thus, when not arranged in super-  
169 complexes, (at least) IM30 dimers have an intrinsically disordered C-terminal domain that clearly  
170 is involved in protein dimerization (as shown here). Furthermore, at reduced salt concentrations,  
171 this domain can also form higher-ordered oligomers (Supplementary Fig. 13c), and thus the  
172 isolated disordered region likely has multiple positions for binding other IM30 proteins, which  
173 facilitates self-assembly on membranes.

## 174 **Discussion**

175 The core structure of IM30 proteins is the coiled-coil formed by the helices 2 and 3<sup>15,19,30,31</sup>. This  
176 structure is stable even in the isolated, monomeric helix 2-3a fragment<sup>30</sup>; thus, no additional  
177 interactions with other parts of the protein are required for secondary and tertiary structure  
178 formation of this fragment. In contrast, the isolated C-terminal region comprising helix 3b-7 is  
179 largely unstructured, albeit capable of forming stable dimers. If combined in the full-length WT  
180 protein, large oligomeric rings form, in which also the helix 3b-7 region appears to be mostly  $\alpha$ -  
181 helical (Supplementary Fig. 8b). Thus, folding and homo-oligomerization of the h3b-7 region are  
182 interconnected, and inter-molecular interactions within the oligomer appear to induce the formation  
183 of  $\alpha$ -helices. This interconnection is supported by the observation that the C-terminal region of the  
184 oligomerization-incompetent mutant IM30\* remains unstructured even in the full-length protein,  
185 most likely because stabilizing interactions with neighboring protomers are largely reduced.  
186 Actually, the structure of the full-length IM30\* protein resembles the sum of the two WT  
187 fragments. Thus, it is reasonable to assume that also in the full-length WT protein the C-terminal  
188 region is largely unstructured when the protein is not part of IM30 super-complexes.

189 While the isolated C-terminal region of IM30 oligomerizes, assembly of IM30 ring super-  
190 complexes involves additional interactions between other IM30 regions. In fact, we recently  
191 observed that the isolated helix 2/3 coiled-coil does have an intrinsic propensity to dimerize<sup>30</sup> but  
192 does not form higher-ordered super-complexes. Thus, interactions involving both, the helix 2-3  
193 coiled-coil as well as (at least) the region containing helices 4-6, are required for ring formation<sup>30</sup>.  
194 Likely, the residues of the conserved FERM cluster located in helix 4 are crucially involved in  
195 mediating and/or stabilizing contacts between adjacent IM30 protomers in the ring. Weakening (or  
196 abolishing) these contacts via mutation of these residues has now enabled us to analyze the structure

197 and activity of small IM30 oligomer, *i.e.*, IM30\* dimers. While the structure of the helix 2-3 core  
198 is mostly unaffected when the dimers are compared with the super-complexes (see Fig. 3b), the  
199 structure of the C-terminal helices 4-7 dramatically differs when IM30<sup>(\*)</sup> monomers are not part of  
200 ring super-complexes. While the introduced Ala residues were expected to further promote  $\alpha$ -helix  
201 formation<sup>32</sup>, the C-terminal part of the here analyzed variant remains completely unstructured (Fig.  
202 3).

203 Yet, the dimeric IM30\* protein shows faster membrane binding and more efficient membrane  
204 protection than the WT protein (Fig. 1d/e). This observation is perfectly in line with the recent  
205 notion that the isolated helix 2-3 coiled-coil effectively binds to membrane surfaces<sup>30</sup>. As this  
206 coiled-coil is buried and involved in protomer-protomer interactions when IM30 monomers are  
207 part of higher-ordered ring structures<sup>19,30</sup>, the WT protein can efficiently bind to membrane surfaces  
208 only upon ring disassembly. This crucial step in carpet formation is not required anymore in case  
209 of the dimeric IM30\* protein, where the helix 2/3 coiled-coil is readily exposed to facilitate  
210 membrane binding. However, membrane binding of the helix 2-3 coiled-coil alone does not result  
211 in membrane protection, but rather in membrane destabilization<sup>30</sup>. This strongly suggests that the  
212 C-terminus is mainly responsible for the membrane protecting activity of IM30, in line with the  
213 observation that the isolated C-terminus oligomerizes (Supplementary Fig. 13a). As shown here,  
214 IM30-mediated membrane protection is associated with the formation of carpet-like structures on  
215 the membrane surface (Fig. 1). These carpets form via association of IM30 protomers on the  
216 membrane surface, but not in solution, and involve interactions between the disordered C-terminal  
217 regions.

218 Disordered protein domains exhibit an increased surface area for interaction, which can be  
219 beneficial for interaction with multiple binding partners. Self-assembling IDPs (intrinsically

220 disordered proteins) can form higher-ordered protein complexes, where disordered protomers  
221 undergo binding-induced folding during super-complex formation<sup>33,34,35</sup>, which also appears to be  
222 the case when IM30 rings form in solution. *Vice versa*, IM30 rings appear to disassemble upon  
223 membrane binding and condensate into extended carpets on the membrane, which again requires  
224 interactions between the disordered C-termini. Noteworthy, while not observed here, carpet  
225 formation could also involve partial structuring of this region.

226 Protein self-assembly on membrane surfaces, resulting in membrane-covering protein structures,  
227 has been observed before, *e.g.* in case of Alzheimer's or Parkinson's disease<sup>36,37</sup>. Yet, here  
228 formation of protein assemblies on membrane surfaces results in membrane destabilization and  
229 rupture. In contrast, IM30 carpets suppress proton leakage in liposomes and thereby maintain the  
230 integrity of membranes, as previously suggested for its ancestor PspA, which is thought to form  
231 scaffold-like structures to cover large membrane areas and prevent leakage<sup>38,39</sup>. The idea of IM30  
232 and PspA having similar membrane stabilizing functions is in agreement with the observation that  
233 IM30 can functionally complement *E. coli pspA* null mutants<sup>40</sup>. This finding is also in line with the  
234 observation that IM30-overexpressing *Arabidopsis thaliana* strains display improved heat stress  
235 recovery<sup>14</sup> and that IM30 forms large assemblies at TMs in cyanobacteria under stress  
236 conditions<sup>11,14</sup>. These assemblies, which likely correspond to the IM30 carpet structures observed  
237 in the present study, have been identified *in vivo* to dynamically localize, preferably at stressed TM  
238 regions<sup>3</sup>. In fact, dynamic self-assembly is typically observed with IDPs, often involving liquid-  
239 liquid phase separation<sup>33,41,42</sup>. In contrast to the formation of membrane-less organelles in cells,  
240 induced by liquid-liquid phase separation of IDPs, demixing into a condensed and a protein-light  
241 fraction (*i.e.* carpets and unassociated but membrane-attached protomers) appears to take place on  
242 the membrane surface in case of IM30. Restricting protein-protein interaction to the membrane

243 surface limits the degrees of freedom to a 2D surface, which likely increased the efficiency of  
244 carpet formation.

245

## 246 **Methods**

### 247 *Expression and purification of IM30*

248 N-terminally His-tagged *Synechocystis* IM30 (IM30 WT; from *Synechocystis* sp. PCC 6803) was  
249 expressed in *E. coli* BL21 (DE3) using a pRSET6 based plasmid. Cells were resuspended in 50  
250 mM NaPhosphate, 300 mM NaCl, 20 mM imidazole (pH 7.6) and lysed by sonification. IM30 was  
251 purified from the cleared lysate using Ni-Affinity chromatography<sup>12</sup>. IM30\* (E83A, E84A, F168A,  
252 E169A, R170A, M171A), IM30\_A227C (A272C) and IM30\*\_A227C (E83A, E84A, F168A,  
253 E169A, R170A, M171A, A227C) were generated via site-directed mutagenesis. The WT-  
254 fragments IM30\_H2-3a (amino acids 22-145) and IM30\_H3b-7 (amino acids 147-267) were  
255 generated by PCR cloning<sup>30</sup>. IM30-CFP and IM30-Venus were generated by restriction digestion  
256 and T4 ligation of the CFP/Venus fragments into pRSET *SynIM30* plasmids<sup>43</sup>. All IM30 variants  
257 were expressed and purified as described for the WT<sup>12</sup>. After isolation, the proteins were further  
258 purified by size exclusion chromatography (Superdex 200 16/60 HL, GE Healthcare) and eluted in  
259 20 mM HEPES pH 7.6 at 8 °C. Peak fractions were pooled and concentrated by a centrifugal filter  
260 unit (PES membrane (PALL), 5000 g, 4 °C). Protein concentration was estimated by absorbance  
261 at 280 nm or 230 nm for the IM30\_H3b-7, respectively.

262

263 *Size Exclusion Chromatography (SEC)*

264 The oligomeric state of IM30\* and IM30 fragments was analyzed using an ÄKTA basic system  
265 (GE Healthcare) with a Superose12 10/300 GL column (GE Healthcare) equilibrated with 20 mM  
266 HEPES pH 7.6 and 0, 50, 100, 150 or 300 mM NaCl at 8 °C. Protein elution was monitored at 280  
267 nm. The column was calibrated using proteins of known molecular mass.

268

269 *SEC coupled multi-angle laser light scattering*

270 The oligomeric states of IM30\_H2-3a and IM30\_H3b-7 were analyzed by SEC coupled multi-  
271 angle laser light scattering (SEC-MALS). Protein solutions of IM30\_H2-3a or IM30\_H3b-7 in 25  
272 mM HEPES, 125 mM NaCl, 5% glycerol (w/w) were analyzed at RT, using a Superdex 200  
273 Increase 10/300 GL column (GE Healthcare) equilibrated with 25 mM HEPES (pH 7.5), 125 mM  
274 NaCl, 5% glycerol (w/w) connected to an UV-Vis detector (BioRad UV 1806) and a MALS  
275 detector (Wyatt DAWN DSP) using an Agilent 1100 series pump. Protein elution was monitored  
276 by absorbance at 280 nm for IM30\_H2-3a ( $\epsilon_{280}=0.417 \text{ cm}^2\cdot\text{mg}^{-1}$ ) or 230 nm for IM30\_H3b-7  
277 ( $\epsilon_{230}=2.747 \text{ cm}^2\cdot\text{mg}^{-1}$ ), respectively.

278

279 *Trypsin digestion of IM30*

280 2.5  $\mu\text{M}$  IM30 WT was incubated in absence or presence of 0.1 mM DOPG  
281 (dioleoylphosphatidylglycerol; Avanti Polar lipids) unsized unilamellar liposomes<sup>12</sup> for 30 min at  
282 RT. Trypsin (bovine pancreas, 5000 USP/mg, Sigma-Aldrich) was added to a final concentration  
283 of 0.01 mg/mL and the mixture was incubated for 60 min at 4 °C. The mixture was sampled

284 periodically and the reaction in each sample was stopped by adding 5x SDS loading buffer  
285 (containing 250 mM Tris, 10% SDS (w/v), 0.2% bromophenol blue (w/v), 50% glycerol (w/v), 500  
286 mM DTT) and immediate heating to 95 °C. The samples were analyzed via SDS-PAGE on a 12%  
287 acrylamide gel.

288

### 289 *Limited proteolysis*

290 IM30\* in 20 mM HEPES pH 7.6 was incubated with the endoproteinase GluC on ice at  
291 protease:protein ratios of 1:10, 1:100 and 1:1000 for 30 or 60 min. The reaction was stopped by  
292 addition of 5xSDS-sample buffer and subsequent heating to 95 °C. Samples were analyzed by SDS-  
293 PAGE on a 12% acrylamide gel. A suitable band was cut and analyzed by in-gel digestion followed  
294 by MALDI mass fingerprinting<sup>44</sup>.

295

### 296 *FRET measurements*

297 For FRET (Förster resonance energy transfer) measurements, IM30-CFP and IM30-Venus were  
298 expressed as described<sup>43</sup> and copurified after mixing cell pellets prior to cell lysis in a ratio of 27%  
299 CFP and 63% Venus (w/w). A solution with 0.2 μM of the purified CFP/Venus labeled IM30 rings  
300 was incubated with increasing DOPG concentrations (0 – 1000 μM lipid, unilamellar liposomes)  
301 for ~2 h at RT. Fluorescence was measured using a FluoroMax 4 fluorimeter (Horiba Scientific).  
302 For FRET measurements, an excitation wavelength of 420 nm (slit width 3 nm) was chosen and  
303 spectra were recorded from 440 - 700 nm (slit width 3 nm). In order to correct for the contribution  
304 of liposome light scattering and to detect a change in the relative contribution of CFP and Venus  
305 fluorescence due to decreased FRET, a superposition of spectra measured for the individual

306 components in absence of the others was fitted to each spectrum (equation 1) yielding the fractional  
307 contribution  $f$  for each spectrum, relative to the corresponding reference spectrum.

$$S_{meas} = f_{lip}S_{lip} + f_{cfp}S_{cfp} + f_{ven}S_{ven} \quad (1)$$

308 The buffer spectrum was subtracted beforehand. In presence of liposomes  $f_{cfp}$  tends to increase,  
309 while  $f_{ven}$  tends to increase, indicating reduced FRET. Since the overall change is not very large,  
310 the trend in the values for  $f$  is overlaid by the slight change in the individual apparent quantum  
311 yields, as determined by measuring the CFP and Venus fluorescence in absence of the FRET  
312 partner, but presence of lipids. Furthermore, variations in the IM30 concentration leads to scattering  
313 of the  $f$  values. In order to correct for the variations of IM30 concentration, the data are presented  
314 as ratio of  $f_{ven}/f_{cfp}$  and finally normalized to the value in absence of liposomes. By comparing the  
315 resulting curve with the one observed for the controls ( $f_{ven}/f_{cfp}$  obtained individually in absence of  
316 the FRET partner) the effect of FRET can be distinguished from the effect of changes in quantum  
317 yield due to presence of liposomes. This procedure was performed for three sets of data (each  
318 including control and FRET measurements), and the average and standard error calculated for the  
319 resulting normalized  $f$ -ratio.

320

### 321 *CD spectroscopy*

322 CD spectra of IM30\*, IM30\_H3b-7 and IM30 WT (0.1 mg/mL) were measured in absence and  
323 presence of 2,2,2-trifluoroethanol (TFE, 8 M) using a JASCO-815 CD spectrometer with an  
324 MPTC-490S temperature-controlled cell holder. Spectra were measured from 260 to 190 nm (cell  
325 length 0.1 cm, 1 nm data pitch, 5 nm bandwidth, 100 nm/min, 1 s data integration time, averaged  
326 over 6 accumulations of the same sample). Spectra were smoothed with a Savitzky-Golay filter and



327 the spectra of three samples were averaged. The secondary structure composition was analyzed  
328 with BeStSel<sup>45</sup>.

329 The stability of the secondary structure of IM30 WT in 10 mM HEPES or Tris was measured by  
330 urea denaturation. The protein was incubated with 0 to 5 M urea overnight. CD spectra were  
331 measured from 200 nm to 260 nm (2 nm bandwidth, 1 s data integration time, 100 nm/min, 9  
332 accumulations per sample). The ellipticity at 222 nm was plotted against the urea concentration  
333 and the resulting denaturation curve was normalized between 0 and 1, assuming full denaturation  
334 at 5 M urea. Then the data were fitted with a two-state unfolding model:

$$f_D = \frac{F - U}{1 + e^{(c-T_m)/dc}} + U \quad (2)$$

335 Where  $f_D$  is the fraction of denatured protein,  $F$  is the folded state,  $U$  is the unfolded state,  $c$  is the  
336 concentration of urea and  $T_m$  is the transition midpoint.

337 The thermal stability of IM30\* at increasing NaCl concentrations and of IM30 WT at increasing  
338 isopropanol concentrations was determined via CD spectroscopy. During the temperature ramp,  
339 CD spectra were measured from 200 to 250 nm (cell length 0.1 cm, 1 nm data pitch, 5 nm  
340 bandwidth, 200 nm/min, 1 s data integration time, averaged over 3 accumulations of the same  
341 sample). The temperature gradient was set to 15 - 95 °C (2 °C steps, overall heating rate 0.27  
342 °C/min). Spectra were smoothed with a Savitzky-Golay filter. The denaturation curves (ellipticity  
343 at 222 nm vs. temperature) from three independent measurements were averaged. The first  
344 derivative of the averaged denaturation curves was used to determine the phase transition  
345 temperature as the center of the transition peak.

346

347 *Hydrogen-deuterium exchange mass spectrometry*

348 Hydrogen-deuterium exchange mass spectrometry (HDX-MS) was essentially conducted as  
349 described previously<sup>46,47</sup>. Sample preparation was aided by a two-arm robotic autosampler (LEAP  
350 Technologies). IM30 or IM30\* (50  $\mu$ M) was diluted 10-fold in D<sub>2</sub>O-containing buffer (20 mM  
351 HEPES-Na pH 7.6). After incubating for 10, 95, 1,000 or 10,000 s at 25 °C, the reaction was  
352 stopped by mixing with an equal volume of pre-dispensed quench buffer (400 mM KH<sub>2</sub>PO<sub>4</sub>/H<sub>3</sub>PO<sub>4</sub>  
353 + 2 M guanidine-HCl; pH 2.2) kept at 1 °C and 100  $\mu$ l of the resulting mixture injected into an  
354 ACQUITY UPLC M-Class System with HDX Technology<sup>48</sup>(Waters). Undeuterated samples of  
355 IM30 and IM30\* were generated similarly by 10-fold dilution in H<sub>2</sub>O-containing buffer. The  
356 injected protein samples were washed out of the injection loop with water + 0.1% (v/v) formic acid  
357 at 100  $\mu$ l/min flow rate and guided to a column of immobilized porcine pepsin enabling protein  
358 digestion at 12 °C. The resulting peptic peptides were collected for three minutes on a trap column  
359 (2 mm x 2 cm) kept at 0.5 °C and filled with POROS 20 R2 material (Thermo Scientific). The trap  
360 column was then placed in line with an ACQUITY UPLC BEH C18 1.7  $\mu$ m 1.0 x 100 mm column  
361 (Waters) and the peptides eluted with a gradient of water + 0.1% (v/v) formic acid (eluent A) and  
362 acetonitrile + 0.1% (v/v) formic acid (eluent B) at 30  $\mu$ l/min flow rate as follows: 0-7 min/95-65%  
363 A, 7-8 min/65-15% A, 8-10 min/15% A. The peptides were guided to a Synapt G2-Si mass  
364 spectrometer (Waters) equipped with an electrospray ionization source and ionized at a capillary  
365 temperature 250 °C and spray voltage of 3.0 kV. Mass spectra were acquired over a range of 50 to  
366 2000  $m/z$  in HDMS<sup>E</sup> (enhanced high definition MS) or HDMS mode for undeuterated and  
367 deuterated samples, respectively<sup>49,50</sup>. [Glu1]-Fibrinopeptide B standard (Waters) was utilized for  
368 lock mass correction. During separation of the peptides on the C18 column, the pepsin column was  
369 washed three times by injecting 80  $\mu$ l of 0.5 M guanidine hydrochloride in 4 % (v/v) acetonitrile.

370 Blank runs (injection of double-distilled water instead of sample) were performed between each  
371 sample. All measurements were carried out in triplicate.

372 Peptides of IM30 and IM30\* were identified and evaluated for their deuterium incorporation with  
373 softwares ProteinLynx Global SERVER 3.0.1 (PLGS) and DynamX 3.0 (both Waters). Peptides  
374 were identified with PLGS from the non-deuterated samples acquired with HDMS<sup>E</sup> employing low  
375 energy, elevated energy and intensity thresholds of 300, 100 and 1,000 counts, respectively and  
376 matched using a database containing the amino acid sequences of IM30, IM30\*, pepsin and their  
377 reversed sequences. Hereby, the search parameters were as follows: Peptide tolerance = automatic;  
378 fragment tolerance = automatic; min fragment ion matches per peptide = 1; min fragment ion  
379 matches per protein = 7; min peptide matches per protein = 3; maximum hits to return = 20;  
380 maximum protein mass = 250,000; primary digest reagent = non-specific; missed cleavages = 0;  
381 false discovery rate = 100. For quantification of deuterium incorporation with DynamX, peptides  
382 had to fulfil the following criteria: Identification in at least 4 of the 6 non-deuterated samples;  
383 minimum intensity of 25,000 counts; maximum length of 25 amino acids; minimum number of  
384 products of two; maximum mass error of 25 ppm; retention time tolerance of 0.5 minutes. All  
385 spectra were manually inspected and omitted if necessary, for example in case of low signal-to-  
386 noise ratio or the presence of overlapping peptides disallowing the correct assignment of the  
387 isotopic clusters. HDX-MS data can be found in the supplemental dataset<sup>51</sup>.

388

### 389 *Nuclear magnetic resonance (NMR) spectroscopy*

390 The <sup>1</sup>H NMR spectrum of a 110 μM sample of IM30\_H3b-7 in 20 mM HEPES pH 7.6, 100 mM  
391 NaCl supplemented with 10% D<sub>2</sub>O was recorded on an 800 MHz Bruker Avance III HD NMR

392 spectrometer equipped with a triple resonance HCN-cryogenic probe head at 298 K. Suppression  
393 of the water signal was achieved by excitation sculpting, using a Bruker standard pulse sequence.  
394 The spectrum was processed with Topspin (Bruker, Karlsruhe, Germany).

395

#### 396 *SEC coupled small-angle X-ray scattering (SEC-SAXS)*

397 SAXS experiments were performed at beamline P12 operated by EMBL Hamburg at the PETRA  
398 III storage ring (DESY, Hamburg, Germany). SAXS data,  $I(q)$  versus  $q$ , where  $q=4\pi\sin\theta/\lambda$  is the  
399 momentum transfer and  $2\theta$  is the scattering angle and  $\lambda$  the X-ray wavelength ( $\lambda = 1.24 \text{ \AA}$ ; 10 keV),  
400 were collected using online size exclusion chromatography with a splitter, directing half of the  
401 eluted sample to MALS light detectors as described in<sup>52</sup> and the remaining half to the beamline for  
402 SAXS data collection. The protein was heated to 50 °C and subsequently cooled down to room  
403 temperature slowly followed by buffer exchange via SEC to 25 mM HEPES (pH 7.5), 125 mM  
404 NaCl, 5% glycerol (w/w) and 2 mM TCEP. This treatment appeared to be necessary, as especially  
405 lipids, which tend to stick to IM30 proteins even after purification by usual SEC<sup>16</sup>, were removed.  
406 The structure of the protein was verified by comparing CD-spectra before and after the procedure  
407 (Supplementary Fig. 2g). 75  $\mu$ L of 14.4 mg/mL IM30\* were loaded on a Superdex 200 10/300 GL  
408 column (GE Healthcare) equilibrated with 25 mM HEPES (pH 7.5), 125 mM NaCl, 5% glycerol  
409 (w/w) and 2 mM TCEP at RT. Each run consisted of 50 minutes of data-collection, with 3000  
410 frames being collected at an exposure time of 1 s. Data were analyzed using the ATSAS software  
411 package<sup>53</sup>. The primary 2D-data underwent standard automated processing (radial averaging), and  
412 background subtraction was performed using CHROMIXS<sup>54</sup>, combined with additional manual  
413 and statistical evaluation (*e.g.*, for radiation damage) to produce the final 1D-SAXS profiles  
414 presented here. The molecular mass of the particles across the analyzed peak was calculated based

415 on the methods implemented in CHROMIXS. The values presented in this report are averages of  
416 both the consensus Bayesian assessment<sup>55</sup> and the SAXSMoW volume correlation<sup>56</sup> approach for  
417 calculating the masses. Estimation of the radius of gyration ( $R_g$ ) by Guinier-plot analysis was  
418 performed using the *autorg* function of PRIMUS<sup>57</sup>. The first 19 data points at low angles in the  
419 Guinier region were excluded from further analysis. GNOM was used for pair distance distribution  
420 analysis of the data within a range of  $q=0.0929-7.2965\text{ nm}^{-1}$ , choosing a  $D_{max}$  of 26 nm and forcing  
421 the  $P(r)$  function to 0 at  $D_{max}$ <sup>58</sup>. *Ab initio* modeling via the generation of dummy residue models  
422 was performed with GASBOR based on the  $P(r)$  function in reciprocal space<sup>59</sup>. The number of  
423 dummy residues was set to 290 for a p2 particle symmetry. A p2 symmetry was assumed, as  
424 choosing higher degrees of freedom did result in bead models with higher  $\chi^2$  values. 115 GASBOR  
425 bead models were generated in total. The bead models were clustered by running DAMCLUST  
426 and setting a p2 symmetry and considering only backbone atoms to ignore water molecules in the  
427 GASBOR models<sup>60</sup>.

428

#### 429 *Model building*

430 IM30 dimer models were generated according to the scheme presented in Supplementary Fig. 11b.  
431 From the clusters generated by DAMCLUST, one isolated cluster (cluster 14) was excluded from  
432 further analysis. For each of the other clusters, the most typical bead model according to  
433 DAMCLUST was chosen. Water molecules in the bead model were removed. Then the model was  
434 transformed into a density map with a resolution of 4 Å by the Molmap command implemented in  
435 CHIMERA<sup>61</sup>. A resolution of 4 Å was chosen because the beads were treated as hard spheres and  
436 have a diameter of 3.8 Å. The resulting dimer maps were split along the symmetry axes to create  
437 maps of the monomer using SEGGER<sup>62</sup>. To fit IM30 into the map, a predicted structure of the

438 monomer (IM30\_Saur2017<sup>19</sup>) was used as an initial template. The predicted structure was  
439 fragmented by removing the loops and keeping the helices intact, yielding six helix fragments  
440 (Supplementary Fig. 11a). The fragments were placed manually into the map to roughly fit the  
441 density. MODELLER was used to recreate the missing loop regions between the fragments and to  
442 remodel the parts of the structure, which are considered to be flexible according to the results of  
443 the HDX measurements of IM30\*<sup>63</sup>. A threshold of 45% relative HDX (after 10 s) was set as the  
444 limit to define a part of the structure as flexible. We refined the models by a simulated annealing  
445 molecular dynamics (MD) approach guided by the density map using FLEX-EM<sup>64,65</sup>. At least 50  
446 runs of subsequent MD refinement were performed, using a cap shift of 0.15 to restrain secondary  
447 structure elements and keeping helix 2 and 3a as rigid bodies. Two of each refined monomer  
448 structures were then placed into the dimer maps by exhaustive One-At-A-Time 6D search (colores)  
449 and simultaneous multi-fragment refinement (collage), using the SITUS package<sup>66</sup>. Where  
450 necessary, clashes in the dimer interfaces were removed by running a short minimization procedure  
451 implemented in CHIMERA (100 steepest descent steps, step size 0.02 Å, 10 conjugate gradient  
452 steps, step size 0.02 Å)<sup>67,68</sup>.

453

#### 454 *ACMA proton leakage assay*

455 An aliquot of unsized unilamellar DOPG liposomes (400 µM lipid concentration, in 20 mM HEPES  
456 pH 7.6 + 150 mM KCl) was incubated with 2.4 µM protein for 5 min at RT. Thereafter, the mixture  
457 was diluted with 20 mM HEPES pH 7.5 + 150 mM NaCl and isopropanol to a final concentration  
458 of 6% isopropanol (v/v), 100 µM lipid and, 0.6 µM protein (Noteworthy, the secondary structure  
459 and overall stability of IM30 were preserved at 6% isopropanol (Supplementary Fig. 6)). 1 µL  
460 ACMA (*9-Amino-6-chloro-2-methoxyacridine*) was added to a final concentration of 2 µM. The

461 sample was then incubated for another 200 s at RT in a 3 mL glass cuvette with continuous stirring.  
462 The fluorescence intensity was measured with a FluoroMax 4 fluorimeter (Horiba Scientific), using  
463 an excitation wavelength of 410 nm (slit width 2 nm), an emission wavelength of 490 nm (slit  
464 width 2 nm) and a measurement interval of 0.1 s. The measurement was started by addition of 1  
465  $\mu\text{L}$  valinomycin (final concentration 0.02  $\mu\text{M}$ ), to render the liposomes permeable for  $\text{K}^+$ , which  
466 results in formation of a proton gradient across the membrane. The fluorescence intensity was  
467 monitored for 300 s with continuous stirring. Thereafter, the proton gradient was quenched by the  
468 addition of CCCP ([3-chlorophenyl)hydrazono]malononitrile) to a final concentration of 2  $\mu\text{M}$ ,  
469 and the fluorescence intensity was monitored for another 100 s.

470 The fluorescence intensity was normalized by setting the intensity to 100% prior to the addition of  
471 valinomycin and the intensity 100 s after addition of CCCP to 0%. The initial slopes were estimated  
472 by a linear fit over 10 to 30 s after addition of valinomycin.

473

#### 474 *Laurdan fluorescence measurement*

475 Unsized unilamellar DOPG liposomes containing Laurdan (6-Dodecanoyl-N, N-dimethyl-2-  
476 naphthylamine, from Sigma, Taufkirchen, Germany) (molar ratio lipid:Laurdan=1:500) were  
477 produced as described elsewhere<sup>12</sup>. To analyze the kinetics of IM30 membrane binding, liposomes  
478 and protein were mixed to a final concentration of 2.5  $\mu\text{M}$  IM30 and 100  $\mu\text{M}$  lipid. Fluorescence  
479 emission spectra were recorded at 25 °C over 20 minutes every 20 s using a FluoroMax-4  
480 spectrometer (Horiba Scientific) from 425 to 505 nm upon excitation at 350 nm. The excitation and  
481 emission slit width was set at 1 nm and 10 nm, respectively. The Generalized Polarization (GP)  
482 defined by Parasassi *et al.*<sup>69</sup> was calculated according to equation 3.  $\Delta\text{GP}$  values were calculated

483 via subtraction of the linear fit function of the DOPG control from the measurements in presence  
484 of protein.

$$GP = \frac{I_{440} - I_{490}}{I_{440} + I_{490}} \quad (3)$$

#### 485 *Atomic force microscopy (AFM)*

486 To visualize IM30-binding to mica surfaces, 50  $\mu$ L adsorption buffer (10 mM Tris, 150 mM KCl,  
487 25 mM MgCl<sub>2</sub>, pH 7.6 or 10 mM HEPES, 150 mM KCl, 25 mM MgCl<sub>2</sub>, pH 7.6) was incubated on  
488 freshly cleaved muscovite mica (12 mm diameter; Ted Pella Inc. grade V1) for 5 min at RT. All  
489 buffers and solutions were freshly prepared and filter sterilized (0.2  $\mu$ m filter) before use. The mica  
490 substrate was washed two times with 50  $\mu$ L of adsorption buffer. Then, 5  $\mu$ L IM30 WT was added  
491 to a final concentration of  $\sim$  0.5  $\mu$ M. The protein was incubated on the substrate for 10 min at RT.  
492 Thereafter, the substrate was washed with  $\sim$  1 mL imaging buffer (10 mM Tris, 150 mM KCl, pH  
493 7.6 or 10 mM HEPES, 150 mM KCl, pH 7.6).

494 To visualize IM30 binding on membranes, a solid-supported lipid bilayer (SLB) was prepared as  
495 follows: A freshly cleaved muscovite mica disc (12 mm diameter; Ted Pella Inc. grade V1) was  
496 washed with adsorption buffer (20 mM MgCl<sub>2</sub>, 20 mM HEPS, pH 7.6) two times (50  $\mu$ L). All  
497 buffers and solutions were freshly prepared and filter sterilized (0.2  $\mu$ m filter) before use. 50  $\mu$ L of  
498 the adsorption buffer was left on the mica, and 50  $\mu$ L liposome suspension (100% DOPG or 40%  
499 DOPG 60% DOPC, 5 mg/mL unilamellar liposomes<sup>12</sup>) was added. The solution on the mica disc  
500 was gently mixed by pipetting a volume of 50  $\mu$ L up and down two to three times. Then, the mixture  
501 was incubated on the mica disc for 20 to 30 min at RT. Afterwards, the mica was washed with 1  
502 mL imaging buffer (20 mM HEPES pH 7.6), and a drop of 100  $\mu$ L buffer was left on the mica disc.



503 The samples were imaged with a Nanowizard IV AFM (JPK) using uncoated silicon cantilevers  
504 (OMCL AC240; Olympus, tip radius 7 nm, resonance frequency ~70 kHz and ~2 N/m spring  
505 constant). Measurements were carried out in QI mode or tapping mode in imaging buffer at  
506 approximately 30 °C. The force setpoint was set as low as possible, typically around 5 nN for  
507 measurements on SLBs, and <1 nN for measurements on mica. Formation of an intact lipid bilayer  
508 was confirmed by analysis of force-distance curves with high setpoint<sup>70</sup> and by imaging the bilayer  
509 before protein addition. The protein was added to the sample in small volumes (30 -50 µL) to  
510 achieve a final solution of roughly 1.5 µM. Images were scanned with 512x512 px or 256x256 px  
511 and 4.8 ms (or 6 ms) pixel time. The resulting images were analyzed with GWYDDION<sup>71</sup>. The  
512 measured height- images were leveled by removing a polynomial background, and scan rows were  
513 aligned by fitting a second-degree polynomial and aligning the offsets of the substrate or the lipid  
514 surface. The images were cropped to the area of interest. Full images are shown in Supplementary  
515 Fig. 5a/b.

516

### 517 **Data availability statement**

518 The authors declare that the data supporting the findings of this study are available within the paper  
519 and its supplementary information files. The data used to generate graphs and charts shown in Figs.  
520 1a, 1b, 1d, 1e, 2a-f are provided in the Supplementary Data 1. The HDX-MS data used to generate  
521 Fig. 3b are provided in the Supplementary Data 2. All other relevant data are available from the  
522 corresponding author upon reasonable request.

523 **References**

- 524 1. Westphal, S., Heins, L., Soll, J. & Vothknecht, U. C. Vipp1 deletion mutant of  
525 synechocystis: A connection between bacterial phage shock and thylakoid biogenesis?  
526 *Proc. Natl. Acad. Sci. U. S. A.* **98**, 4243–4248 (2001).
- 527 2. Fuhrmann, E., Gathmann, S., Rupprecht, E., Golecki, J. & Schneider, D. Thylakoid  
528 membrane reduction affects the photosystem stoichiometry in the cyanobacterium  
529 *Synechocystis* sp. PCC 6803. *Plant Physiol.* **149**, 735–744 (2009).
- 530 3. Gutu, A., Chang, F. & O’Shea, E. K. Dynamical localization of a thylakoid membrane  
531 binding protein is required for acquisition of photosynthetic competency. *Mol. Microbiol.*  
532 **108**, 16–31 (2018).
- 533 4. Junglas, B. & Schneider, D. What is Vipp1 good for? *Mol. Microbiol.* **108**, 1–5 (2018).
- 534 5. Siebenaller, C., Junglas, B. & Schneider, D. Functional implication of multiple IM30  
535 oligomeric states. doi:10.3389/fpls.2019.01500
- 536 6. Kroll, D. *et al.* VIPP1, a nuclear gene of *Arabidopsis thaliana* essential for thylakoid  
537 membrane formation. *Proc. Natl. Acad. Sci. U. S. A.* **98**, 4238–4242 (2001).
- 538 7. Aseeva, E. *et al.* Vipp1 is required for basic thylakoid membrane formation but not for the  
539 assembly of thylakoid protein complexes. *Plant Physiol. Biochem.* **45**, 119–128 (2007).
- 540 8. Vothknecht, U. C., Otters, S., Hennig, R. & Schneider, D. Vipp1: A very important protein  
541 in plastids?! *J. Exp. Bot.* **63**, 1699–1712 (2012).
- 542 9. Zhang, L., Kato, Y., Otters, S., Vothknecht, U. C. & Sakamoto, W. Essential role of VIPP1  
543 in chloroplast envelope maintenance in *Arabidopsis*. *Plant Cell* **24**, 3695–3707 (2012).
- 544 10. Zhang, L. & Sakamoto, W. Possible function of VIPP1 in thylakoids: Protection but not  
545 formation? *Plant Signal. Behav.* **8**, (2013).
- 546 11. Bryan, S. J. *et al.* Localisation and interactions of the Vipp1 protein in cyanobacteria. *Mol.*  
547 *Microbiol.* **94**, 1179–1195 (2014).
- 548 12. Hennig, R. *et al.* IM30 triggers membrane fusion in cyanobacteria and chloroplasts. *Nat.*

- 549           *Commun.* **6**, (2015).
- 550   13.   Zhang, L. & Sakamoto, W. Possible function of VIPP1 in maintaining chloroplast  
551           membranes. *Biochim. Biophys. Acta - Bioenerg.* **1847**, 831–837 (2015).
- 552   14.   Zhang, L., Kondo, H., Kamikubo, H., Kataoka, M. & Sakamoto, W. VIPP1 has a  
553           disordered C-terminal tail necessary for protecting photosynthetic membranes against  
554           stress. *Plant Physiol.* **171**, 1983–1995 (2016).
- 555   15.   Heidrich, J., Thurotte, A. & Schneider, D. Specific interaction of IM30/Vipp1 with  
556           cyanobacterial and chloroplast membranes results in membrane remodeling and eventually  
557           in membrane fusion. *Biochim. Biophys. Acta - Biomembr.* **1859**, 537–549 (2017).
- 558   16.   Otters, S. *et al.* The first  $\alpha$ -helical domain of the vesicle-inducing protein in plastids 1  
559           promotes oligomerization and lipid binding. *Planta* **237**, 529–540 (2013).
- 560   17.   Fuhrmann, E. *et al.* The vesicle-inducing protein 1 from *Synechocystis* sp. PCC 6803  
561           organizes into diverse higher-ordered ring structures. *Mol. Biol. Cell* **20**, 4620–4628  
562           (2009).
- 563   18.   Gao, F., Wang, W., Zhang, W. & Liu, C.  $\alpha$ -Helical Domains Affecting the  
564           Oligomerization of Vipp1 and Its Interaction with Hsp70/DnaK in *Chlamydomonas*.  
565           *Biochemistry* **54**, 4877–4889 (2015).
- 566   19.   Saur, M. *et al.* A Janus-Faced IM30 Ring Involved in Thylakoid Membrane Fusion Is  
567           Assembled from IM30 Tetramers. *Structure* **25**, 1380-1390.e5 (2017).
- 568   20.   Bultema, J. B., Fuhrmann, E., Boekema, E. J. & Schneider, D. Vipp1 and PspA. *Commun.*  
569           *Integr. Biol.* **3**, 162–165 (2010).
- 570   21.   Hennig, R. *et al.* The IM30/Vipp1 C-terminus associates with the lipid bilayer and  
571           modulates membrane fusion. *Biochim. Biophys. Acta - Bioenerg.* **1858**, 126–136 (2017).
- 572   22.   Theis, J. *et al.* VIPP1 rods engulf membranes containing phosphatidylinositol phosphates.  
573           *Sci. Rep.* **9**, 8725 (2019).
- 574   23.   Liu, C. *et al.* J-domain protein CDJ2 and HSP70B are a plastidic chaperone pair that

- 575 interacts with vesicle-inducing protein in plastids 1. *Mol. Biol. Cell* **16**, 1165–1177 (2005).
- 576 24. Liu, C. *et al.* The chloroplast HSP70B-CDJ2-CGE1 chaperones catalyse assembly and  
577 disassembly of VIPP1 oligomers in *Chlamydomonas*. *Plant J.* **50**, 265–277 (2007).
- 578 25. Osadnik, H. *et al.* PspF-binding domain PspA1-144 and the PspA·F complex: New insights  
579 into the coiled-coil-dependent regulation of AAA+ proteins. *Mol. Microbiol.* **98**, 743–759  
580 (2015).
- 581 26. Thurotte, A., Brüser, T., Mascher, T. & Schneider, D. Membrane chaperoning by members  
582 of the PspA/IM30 protein family. *Commun. Integr. Biol.* **10**, e1264546 (2017).
- 583 27. Heidrich, J. *et al.* Organization into higher ordered ring structures counteracts membrane  
584 binding of IM30, a protein associated with inner membranes in chloroplasts and  
585 cyanobacteria. *J. Biol. Chem.* **291**, 14954–14962 (2016).
- 586 28. Lee, S. Y., Letts, J. A. & MacKinnon, R. Functional Reconstitution of Purified Human  
587 Hv1 H<sup>+</sup> Channels. *J. Mol. Biol.* **387**, 1055–1060 (2009).
- 588 29. Zhang, J., Feng, Y. & Forgac, M. Proton conduction and bafilomycin binding by the V0  
589 domain of the coated vesicle V-ATPase. *J. Biol. Chem.* **269**, 23518–23523 (1994).
- 590 30. Thurotte, A. & Schneider, D. The fusion activity of IM30 rings involves controlled  
591 unmasking of the fusogenic core. *Front. Plant Sci.* **10**, 108 (2019).
- 592 31. Siebenaller, C., Junglas, B. & Schneider, D. Functional Implications of Multiple IM30  
593 Oligomeric States. *Front. Plant Sci.* (2019). doi:10.3389/fpls.2019.01500
- 594 32. Pace, C. N. & Scholtz, J. M. *A Helix Propensity Scale Based on Experimental Studies of*  
595 *Peptides and Proteins.* (1998).
- 596 33. Uversky, V. N. Paradoxes and wonders of intrinsic disorder: Stability of instability.  
597 *Intrinsically Disord. Proteins* **5**, e1327757 (2017).
- 598 34. Rauscher, S. & Pomès, R. The liquid structure of elastin. *Elife* **6**, (2017).
- 599 35. Muiznieks, L. D., Weiss, A. S. & Keeley, F. W. Structural disorder and dynamics of  
600 elastin. in *Biochemistry and Cell Biology* **88**, 239–250 (National Research Council of

- 601 Canada, 2010).
- 602 36. Fabiani, C. & Antollini, S. S. Alzheimer's Disease as a Membrane Disorder: Spatial Cross-  
603 Talk Among Beta-Amyloid Peptides, Nicotinic Acetylcholine Receptors and Lipid Rafts.  
604 *Front. Cell. Neurosci.* **13**, (2019).
- 605 37. Uversky, V. & Eliezer, D. Biophysics of Parkinsons Disease: Structure and Aggregation of  
606 alpha-Synuclein. *Curr. Protein Pept. Sci.* **10**, 483–499 (2009).
- 607 38. Kobayashi, R., Suzuki, T. & Yoshida, M. Escherichia coli phage-shock protein A (PspA)  
608 binds to membrane phospholipids and repairs proton leakage of the damaged membranes.  
609 *Mol. Microbiol.* **66**, 100–109 (2007).
- 610 39. Standar, K. *et al.* PspA can form large scaffolds in Escherichia coli. *FEBS Lett.* **582**, 3585–  
611 3589 (2008).
- 612 40. DeLisa, M. P., Lee, P., Palmer, T. & Georgiou, G. Phage Shock Protein PspA of  
613 Escherichia coli Relieves Saturation of Protein Export via the Tat Pathway. *J. Bacteriol.*  
614 **186**, 366–373 (2004).
- 615 41. Majumdar, A., Dogra, P., Maity, S. & Mukhopadhyay, S. Liquid–Liquid Phase Separation  
616 Is Driven by Large-Scale Conformational Unwinding and Fluctuations of Intrinsically  
617 Disordered Protein Molecules. *J. Phys. Chem. Lett.* **10**, 3929–3936 (2019).
- 618 42. Schuster, B. S. *et al.* Controllable protein phase separation and modular recruitment to  
619 form responsive membraneless organelles. *Nat. Commun.* **9**, (2018).
- 620 43. Heidrich, J. *et al.* Mg<sup>2+</sup> binding triggers rearrangement of the IM30 ring structure,  
621 resulting in augmented exposure of hydrophobic surfaces competent for membrane  
622 binding. *J. Biol. Chem.* **293**, 8230–8241 (2018).
- 623 44. Shevchenko, A., Tomas, H., Havli, J., Olsen, J. V & Mann, M. In-gel digestion for mass  
624 spectrometric characterization of proteins and proteomes. *Nat. Protoc.* **1**, 2856–2860  
625 (2006).
- 626 45. Micsonai, A. *et al.* Accurate secondary structure prediction and fold recognition for  
627 circular dichroism spectroscopy. *Proc. Natl. Acad. Sci. U. S. A.* **112**, E3095-103 (2015).

- 628 46. Pausch, P. *et al.* Structural basis for (p)ppGpp-mediated inhibition of the GTPase RbgA. *J.*  
629 *Biol. Chem.* **293**, 19699–19709 (2018).
- 630 47. Han, X. *et al.* A kiwellin disarms the metabolic activity of a secreted fungal virulence  
631 factor. *Nature* **565**, 650–653 (2019).
- 632 48. Wales, T. E., Fadgen, K.E., Gerhardt, G.C.& Engen, J.R. High-speed and high-resolution  
633 UPLC separation at zero degrees Celsius. *Anal Chem* **80**, 6815-6820 (2008).
- 634 49. Geromanos, S. J. *et al.* The detection, correlation, and comparison of peptide precursor and  
635 product ions from data independent LC-MS with data dependant LC-MS/MS. *Proteomics*  
636 **9**, 1683-1695 (2009).
- 637 50. Li, G. Z. *et al.* Database searching and accounting of multiplexed precursor and product  
638 ion spectra from the data independent analysis of simple and complex peptide mixtures.  
639 *Proteomics* **9**, 1696-1719 (2009).
- 640 51. Masson, G. R. *et al.* Recommendations for performing, interpreting and reporting  
641 hydrogen deuterium exchange mass spectrometry (HDX-MS) experiments. *Nature* **16**,  
642 595–602 (2019).
- 643 52. Graewert, M. A. *et al.* Automated Pipeline for Purification, Biophysical and X-Ray  
644 Analysis of Biomacromolecular Solutions. *Sci. Rep.* **5**, 10734 (2015).
- 645 53. Franke, D. *et al.* ATSAS 2.8: a comprehensive data analysis suite for small-angle  
646 scattering from macromolecular solutions. *J. Appl. Cryst* **50**, 1212–1225 (2017).
- 647 54. Panjkovich, A. & Svergun, D. I. CHROMIXS: automatic and interactive analysis of  
648 chromatography-coupled small-angle X-ray scattering data. *Bioinformatics* **34**, 1944–1946  
649 (2018).
- 650 55. Hajizadeh, N. R., Franke, D., Jeffries, C. M. & Svergun, D. I. Consensus Bayesian  
651 assessment of protein molecular mass from solution X-ray scattering data. *Sci. Rep.* **8**,  
652 (2018).
- 653 56. Fischer, H., de Oliveira Neto, M., Napolitano, H. B., Polikarpov, I. & Craievich, A. F.  
654 Determination of the molecular weight of proteins in solution from a single small-angle X-

- 655 ray scattering measurement on a relative scale. *J. Appl. Crystallogr.* **43**, 101–109 (2010).
- 656 57. Konarev, P. V. *et al.* *PRIMUS*: a Windows PC-based system for small-angle scattering  
657 data analysis. *J. Appl. Crystallogr.* **36**, 1277–1282 (2003).
- 658 58. Svergun, D. I. & IUCr. Determination of the regularization parameter in indirect-transform  
659 methods using perceptual criteria. *urn:issn:0021-8898* **25**, 495–503 (1992).
- 660 59. Svergun, D. I., Petoukhov, M. V & Koch, M. H. Determination of domain structure of  
661 proteins from X-ray solution scattering. *Biophys. J.* **80**, 2946–53 (2001).
- 662 60. Petoukhov, M. V. *et al.* New developments in the ATSAS program package for small-  
663 angle scattering data analysis. *urn:issn:0021-8898* **45**, 342–350 (2012).
- 664 61. Pettersen, E. F. *et al.* UCSF Chimera?A visualization system for exploratory research and  
665 analysis. *J. Comput. Chem.* **25**, 1605–1612 (2004).
- 666 62. Pintilie, G. D., Zhang, J., Goddard, T. D., Chiu, W. & Gossard, D. C. Quantitative analysis  
667 of cryo-EM density map segmentation by watershed and scale-space filtering, and fitting  
668 of structures by alignment to regions. *J. Struct. Biol.* **170**, 427–438 (2010).
- 669 63. Šali, A. & Blundell, T. L. Comparative Protein Modelling by Satisfaction of Spatial  
670 Restraints. *J. Mol. Biol.* **234**, 779–815 (1993).
- 671 64. Joseph, A. P. *et al.* Refinement of atomic models in high resolution EM reconstructions  
672 using Flex-EM and local assessment. *Methods* **100**, 42–49 (2016).
- 673 65. Topf, M. *et al.* Protein Structure Fitting and Refinement Guided by Cryo-EM Density.  
674 *Structure* **16**, 295–307 (2008).
- 675 66. Wriggers, W. Conventions and workflows for using Situs. *Acta Crystallogr. Sect. D Biol.*  
676 *Crystallogr.* **68**, 344–351 (2012).
- 677 67. Wang, J., Wolf, R. M., Caldwell, J. W., Kollman, P. A. & Case, D. A. Development and  
678 testing of a general amber force field. *J. Comput. Chem.* **25**, 1157–1174 (2004).
- 679 68. Wang, J., Wang, W., Kollman, P. A. & Case, D. A. Automatic atom type and bond type  
680 perception in molecular mechanical calculations. *J. Mol. Graph. Model.* **25**, 247–260

- 681 (2006).
- 682 69. Parasassi, T., De Stasio, G., d'Ubaldo, A. & Gratton, E. Phase fluctuation in phospholipid  
683 membranes revealed by Laurdan fluorescence. *Biophys. J.* **57**, 1179–1186 (1990).
- 684 70. Loi, S., Sun, G., Franz, V. & Butt, H. J. Rupture of molecular thin films observed in  
685 atomic force microscopy. II. Experiment. *Phys. Rev. E - Stat. Physics, Plasmas, Fluids,*  
686 *Relat. Interdiscip. Top.* **66**, 31602 (2002).
- 687 71. Nečas, D. & Klapetek, P. Gwyddion: an open-source software for SPM data analysis.  
688 *Open Phys.* **10**, 181–188 (2012).
- 689 72. Franke, D., Jeffries, C. M. & Svergun, D. I. Correlation Map, a goodness-of-fit test for  
690 one-dimensional X-ray scattering spectra. *Nat. Methods* **12**, 419–422 (2015).
- 691 73. Ortega, E. *et al.* The Structure of the Plakin Domain of Plectin Reveals an Extended Rod-  
692 like Shape. *J. Biol. Chem.* **291**, 18643–18662 (2016).
- 693 74. Garst, A. D., Héroux, A., Rambo, R. P. & Batey, R. T. Crystal structure of the lysine  
694 riboswitch regulatory mRNA element. *J. Biol. Chem.* **283**, 22347–51 (2008).

695

696

## 697 **Acknowledgments**

698 This work was funded by the Max-Planck graduate center at the Max Planck institutes and the  
699 University of Mainz. We thank Prof. Dr. Elmar Jaenicke (Institute for Molecular Physiology,  
700 Johannes Gutenberg University Mainz) assistance with MALS measurements, Mario Dejung  
701 (Institute of Molecular Biology, Johannes Gutenberg University) for assistance with MS analysis  
702 and Sabine Wecklein (Institute of Pharmacy and Biochemistry, Johannes Gutenberg University  
703 Mainz) for support with the data acquisition of ACMA proton leakage measurements. The  
704 synchrotron SAXS data were collected at beamline P12 operated by EMBL Hamburg at the  
705 PETRA III storage ring (DESY, Hamburg, Germany). We would like to thank the beamline staff



706 (especially Dr. Nelly Hajizadeh) for assistance in using the beamline. We thank the Deutsche  
707 Forschungsgemeinschaft for co-financing the HDX-system and support through the "DFG core  
708 facility for interactions, dynamics and macromolecular assembly structure" at the Philipps-  
709 University Marburg. Molecular graphics and analyses were performed with UCSF Chimera,  
710 developed by the Resource for Biocomputing, Visualization, and Informatics at the University of  
711 California, San Francisco, with support from NIH P41-GM103311. We thank Prof. Dr. Luning Liu  
712 and Dr. Longsheng Zhao (University of Liverpool, Institute of Integrative Biology) helping us to  
713 find the necessary imaging parameters and conditions for atomic force microscopy of IM30 rings  
714 on mica.

715

#### 716 **Author contributions**

717 BJ, CS, JH, UH, WS, NH and DS were responsible for the general protein characterization study  
718 conception. The AFM studies were conceptualized by BJ, AA and SW. The SAXS studies were  
719 conceptualized by BJ, RO and EW. BJ, CS and JH prepared the protein and liposome samples. BJ,  
720 CS, JH and NH collected and analyzed the general protein characterization data (fluorescence  
721 spectroscopy, CD spectroscopy, SEC, SEC-MALS, gel electrophoresis). BJ and AA collected and  
722 analyzed the AFM data. RO collected the SAXS data. BJ and RO analyzed the SAXS data. UH  
723 collected and analyzed the NMR data. WS collected and analyzed the HDX data. BJ built and  
724 analyzed the structural models. BJ, AA, CS and WS visualized the data. WS, UH, EW, SW and  
725 DS were responsible for supervision, project administration, funding acquisition and resources.

726

727

728 **Competing interests**

729 The authors disclose any financial or non-financial conflict of interest.

730

731 **Additional information**

732 Supplementary and figures are available for this paper.

733 Correspondence and requests for data and materials should be addressed to Dirk Schneider,

734 Johannes Gutenberg University Mainz, Institute of Pharmacy and Biochemistry, Johann-Joachim-

735 Becher-Weg 30, 55128 Mainz, Germany.

736

737 **Figures**

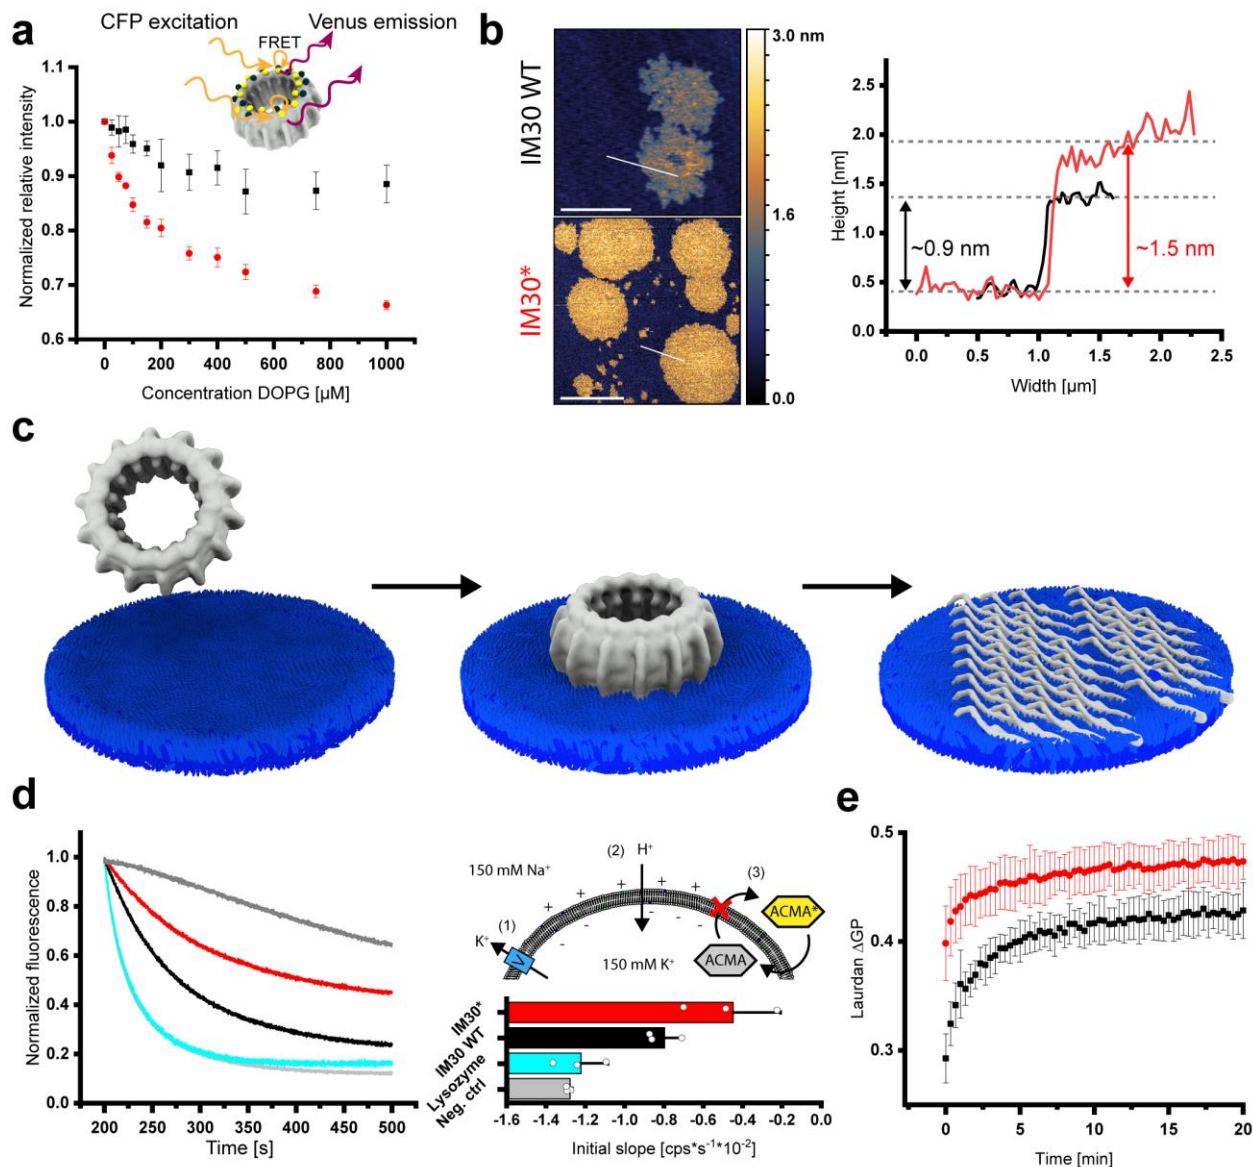

738  
739

740 **Figure 1: Binding of IM30 to negatively charged membrane surfaces results in ring**  
741 **disassembly, carpet formation, and membrane stabilization.**

742 (a) FRET was measured using IM30 rings containing both, IM30-CFP and IM30-Venus monomers  
743 (red). The normalized relative fluorescence intensity (see Materials and Methods) is plotted against  
744 the DOPG concentration. The intensity decreases with increasing DOPG concentrations, indicating  
745 an increasing average distance between the monomers upon interaction with membranes.  
746 Noteworthy, the fluorescence characteristics of the fluorophores alone change only slightly upon

747 membrane binding, resulting in an apparently altered FRET (black). The error bars represent SD,  
748 n=5. **(b)** The structure of IM30 WT and IM30\* bound on a PG bilayer was imaged via AFM (the  
749 false-color ruler indicates the heights in the images). Both IM30 variants form carpet-like  
750 structures. The height-profiles (white section lines in the images) of the carpet-like structures  
751 indicate similar heights of IM30 WT (black line) and IM30\* (red line) carpets. Determined heights  
752 are in the range of 0.7 – 1.9 nm). Single coherent IM30\* carpets have increased dimensions, which  
753 leads to edges appearing rounder than the fractal-like shape of IM30 WT carpets. Scale bar: 1  $\mu$ m  
754 (upper panel) and 3  $\mu$ m (lower panel). **(c)** IM30 appears to initially bind to the membrane as a ring,  
755 followed by disassembly into small oligomers/monomers and rearrangement to a carpet-like  
756 structure. The ring structure was taken from EMD:3740<sup>19</sup>. **(d)** ACMA fluorescence was used to  
757 monitor proton flux across DOPG membranes. Untreated liposomes were slightly permeable for  
758 protons (positive control, dark gray), whereas DOPG liposomes have high proton permeability in  
759 presence of 6% isopropanol (negative control, light gray). Lysozyme, which was used as a control  
760 (cyan), had no effect on the proton permeability. In presence of IM30 WT (black), the proton  
761 permeability of isopropanol-treated DOPG liposomes was reduced. This effect was much stronger  
762 in presence of IM30\* (red). For quantitative analysis, the initial slope of the fluorescence changes  
763 was evaluated. Error bars represent SD (n=3). **(e)** Lipid-binding of IM30 WT (black) and IM30\*  
764 (red) to PG liposomes was determined via monitoring Laurdan fluorescence changes. IM30\*  
765 affects the Laurdan fluorescence emission characteristics ( $\Delta$ GP) much faster than the WT protein.  
766 Error bars represent SD (n=3).

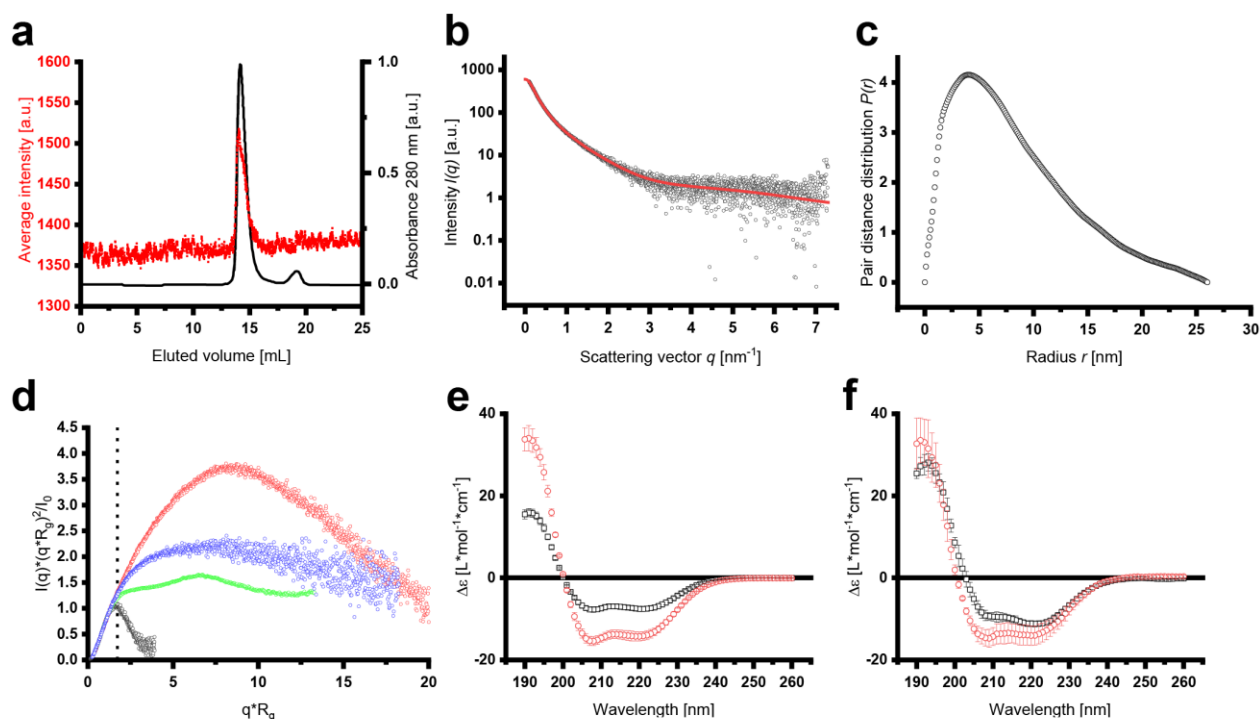

767

768

769 **Figure 2: SEC-SAXS analyses of IM30\* dimers.**

770 (a) The average SAXS intensity (red dots) is compared to the normalized absorbance at 280 nm  
 771 (black line) over the whole elution volume. (b) The scattering intensity after buffer subtraction was  
 772 plotted against the scattering angle  $q$ . The red line represents the fit of the data for the pair distance  
 773 distribution analysis by GNOM ( $\chi^2=1.0392$ ). (c) The pair distance distribution analysis in the range  
 774 of  $q=0.0929-7.2965 \text{ nm}^{-1}$  and forcing to 0 at  $D_{max}=26 \text{ nm}$  gave  $I_0=601.3\pm 4.5 \text{ cm}^{-1}$  and  $R_g=6.86\pm 0.07$   
 775 nm (total quality estimate from GNOM 0.59). (d) A dimensionless Kratky-plot was used to  
 776 compare the scattering data obtained with IM30\* and other proteins. Apparently, the Kratky curve  
 777 of IM30 dimers lies in between the curves of the unfolded lysine riboswitch protein and the Plakin  
 778 domain of Human plectin, which has an extended protein shape, clearly implying an extended and  
 779 somewhat flexible structure of IM30\* dimers. The dashed line indicates  $q*R_g=\sqrt{3}$ . Black dots:  
 780 Lysozyme (SASDA96)<sup>72</sup>. Red dots: Plakin domain of human plectin (SASDBC4)<sup>73</sup>. Green dots:  
 781 Unfolded lysine riboswitch (BIOISIS ID:2LYSRR)<sup>74</sup>. Blue dots: IM30\*. (e) The CD spectrum of  
 782 IM30\* (black squares) showed the typical characteristics of a mainly  $\alpha$ -helical protein, *i.e.*  
 783 pronounced minima at 222 and 208 nm. Yet, the amplitudes of the minima at 222 nm and 208  
 784 nearly doubled upon addition of 8 M TFE (red circles), which is known to induce  $\alpha$ -helical

785 structures in proteins/peptides. This implies that IM30\* is highly unstructured. Error bars represent  
786 SD (n=3). **(f)** The amplitudes of the minima at 222 nm and 208 nm of IM30 WT (black squares)  
787 only slightly increase upon addition of TFE (red circles), confirming the expected high content of  
788  $\alpha$ -helical structures. Error bars represent SD (n=3). Based on the CD-spectra, the  $\alpha$ -helix content  
789 of IM30\* (e) was calculated to be ~57%, which is considerably lower than the reported and  
790 predicted  $\alpha$ -helix content of IM30 WT of ~80%<sup>16-18</sup>. In presence of TFE, both proteins reach about  
791 100%  $\alpha$ -helix content.

792

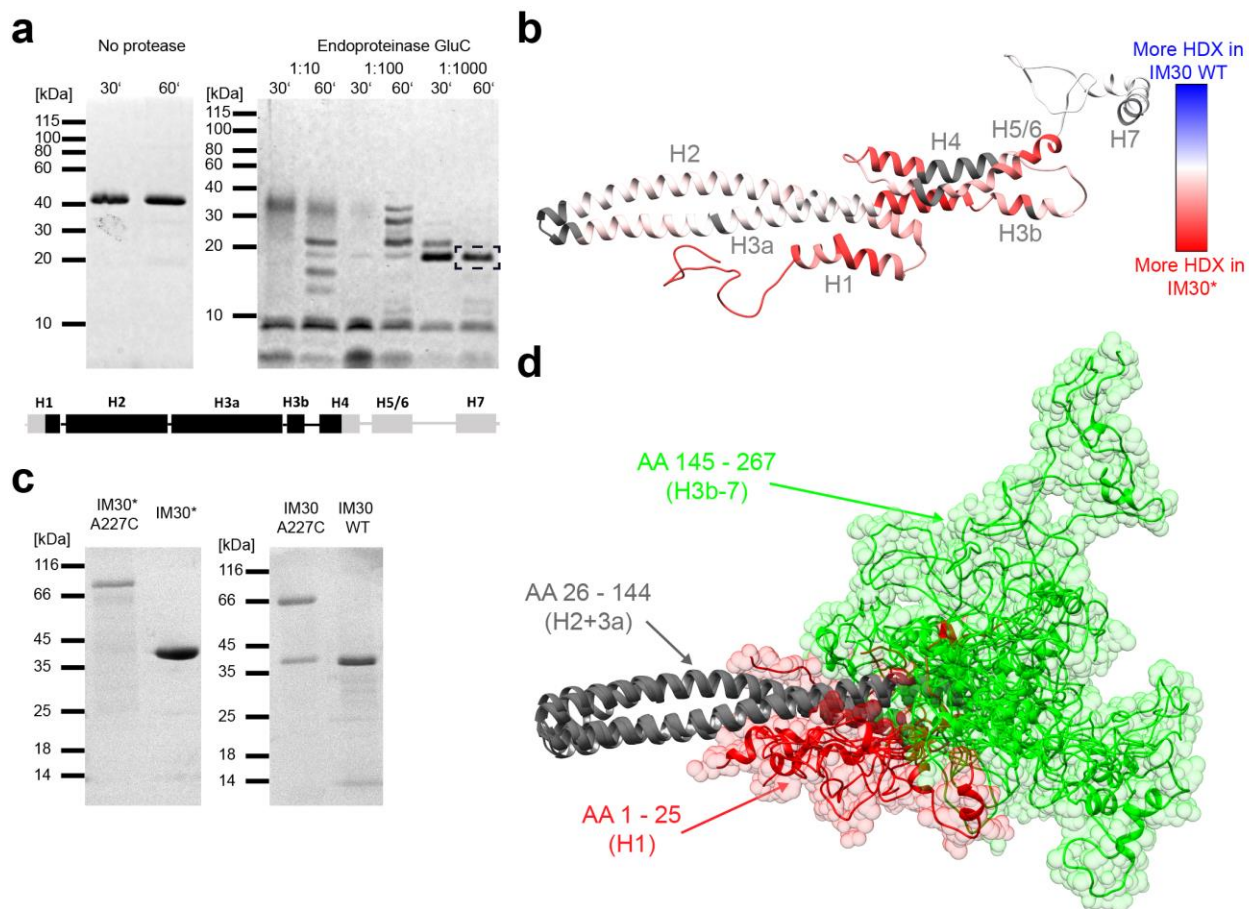

793

794 **Figure 3: IM30\* dimerizes via its unstructured C-terminus.**

795 **(a)** Limited proteolysis of IM30\*: IM30\* was incubated with the endoproteinase GluC at different

796 enzyme-to-substrate ratios for 30 or 60 min, respectively. The peptide patterns were analyzed via

797 SDS-PAGE. The band highlighted with a black box was analyzed by mass spectrometry. Below,

798 the predicted secondary structure of IM30 is shown, whereby each box represents an  $\alpha$ -helical

799 segment. After treatment with endoproteinase GluC, a stable helix 2/3 fragment was identified

800 (with a sequence coverage of ~60%). For more details see Supplementary Fig. 7. **(b)** The difference

801 of relative HDX between IM30\* and IM30 WT after 10 s mapped on the predicted IM30 monomer

802 structure<sup>19</sup> revealed an increased flexibility of helix 1 and helices 3a-5/6 of IM30\* compared to the

803 WT. A large part of helix 7 and the linker region between helix 7 and 6 is highly flexible in both

804 variants. Dark gray regions mark sites where no peptides were detected in the HDX experiment,

805 and thus no data is available. (For more details see Supplementary Fig. 8). **(c)** SDS-PAGE analysis  
806 of A227C mutants of IM30 WT and IM30\* in absence of reducing agents. **(d)** IM30 monomer  
807 models generated based on the SAXS data were aligned at helix 2 and 3a to visualize the flexibility  
808 of the C-terminal region. Helices 2 and 3a (amino acids 26 - 144) are depicted in gray, the C-  
809 terminal amino acids 145 - 267 (H3b-7) are colored in green, and amino acids 1-25 (H1) in red.  
810 The N-terminal region (red) fills a small volume, starting from the rim between helix 2 and 3 with  
811 an only small overlap between the N-terminal and the C-terminal regions. However, the C-terminal  
812 region (green) nearly fills the entire conformational space at the end of the structural core, with  
813 higher accumulation at the very end of helix 3a.
